# Supplementary material for: High-precision Ca isotopic measurement using a large geometry high resolution MC-ICP-MS with a dummy bucket
Source: Royal Society of Chemistry journal article supplement (doi:10.1039/c8ja00234g), 2018-01-01
Supplement: c8ja00234g1.xlsx [file c8ja00234g1.xlsx]

## Sheet: Table S1
Table S1 Determinations of major and trace elements in purified samples by quadrupole ICP-MS (all concentrations are in ng g-1)
Reference material	Blank	NIST SRM 915b	DTS-2	DNC-1	BCR-2	BHVO-2	BIR-1	AGV-2	GSP-2	COQ-1	SGR-1	NOD-A-1	NOD-P-1	Seawater	Alfa Aesar 13852
Lithology		Calcium carbonate	Dunite	Dolerite	Basalt	Basalt	Basalt	Andesite	Granodiorite	Carbonatite	Shale	Manganese Nodule	Manganese Nodule		Standard solution
Li	0.00799323	0.0311333	n.d.	0.0415272	0.0325865	0.0348213	0.0293454	0.0338156	0.0315801	0.0405211	0.0490149	0.0331447	0.0618674	0.0306864	0.0269984
Be	n.d.	0.0941555	n.d.	0.0926795	0.0926795	0.0926795	0.093171	0.0926795	0.0926795	0.093664	0.0926795	0.093171	0.0926795	0.0926795	0.0926795
Na	5.99644	n.d.	n.d.	n.d.	n.d.	n.d.	n.d.	n.d.	n.d.	n.d.	n.d.	n.d.	n.d.	n.d.	n.d.
Mg	0.116754	n.d.	n.d.	n.d.	n.d.	n.d.	n.d.	n.d.	n.d.	n.d.	n.d.	n.d.	n.d.	n.d.	n.d.
Al	0.251221	n.d.	0.220027	0.981425	n.d.	n.d.	n.d.	n.d.	n.d.	n.d.	n.d.	n.d.	0.101967	3.26798	n.d.
Si	2.764	n.d.	2.4865	n.d.	n.d.	n.d.	n.d.	n.d.	n.d.	n.d.	n.d.	n.d.	2.21647	n.d.	n.d.
K	0.131977	n.d.	n.d.	n.d.	n.d.	n.d.	n.d.	n.d.	n.d.	n.d.	n.d.	n.d.	n.d.	0.200569	n.d.
Ca	3.98311	5870.47	4714.59	5899.43	5452.84	7617.61	5686.01	5878.61	5632.07	6021.05	6054.65	4962.99	5503.13	7308.92	6386.38
Sc	0.0192345	0.0799687	n.d.	0.0796286	0.0842179	0.0969654	0.0830279	0.0998543	0.0859188	0.0894868	0.0884671	0.0971347	0.0969649	0.0791188	0.0804786
Ti	0.0375562	n.d.	n.d.	n.d.	0.213428	0.0561338	0.0425805	0.0263019	0.0154577	n.d.	0.0724043	n.d.	0.107662	0.208002	n.d.
V	0.00377795	n.d.	n.d.	n.d.	n.d.	n.d.	n.d.	n.d.	n.d.	n.d.	n.d.	n.d.	0.00991026	n.d.	n.d.
Cr	0.0257072	n.d.	1.27872	n.d.	n.d.	n.d.	n.d.	n.d.	n.d.	n.d.	n.d.	n.d.	n.d.	n.d.	n.d.
Mn	0.0421705	0.246391	0.0834018	0.252461	0.278721	0.248107	0.246655	0.244807	0.242036	0.30828	0.252065	0.250746	0.279908	0.25035	0.247182
Fe	6.8403	21.1568	13.2423	16.3901	19.6567	22.4757	17.7938	20.7823	18.1807	14.4507	14.3459	15.3619	10.7769	23.1655	22.391
Co	0.00297781	n.d.	n.d.	n.d.	n.d.	n.d.	n.d.	n.d.	n.d.	n.d.	n.d.	n.d.	n.d.	n.d.	n.d.
Ni	0.0130705	n.d.	4.61952	n.d.	n.d.	n.d.	n.d.	n.d.	n.d.	n.d.	n.d.	n.d.	n.d.	n.d.	n.d.
Cu	0.00798898	0.0164491	n.d.	0.049685	n.d.	0.00412663	0.00561989	0.0074873	0.00412663	0.00674011	0.00412663	0.0142086	0.00225922	0.00225922	0.00263337
Zn	0.0302973	n.d.	0.217892	0.0788606	n.d.	n.d.	0.000737104	n.d.	n.d.	n.d.	n.d.	n.d.	n.d.	n.d.	n.d.
Ga	n.d.	n.d.	n.d.	n.d.	n.d.	n.d.	n.d.	n.d.	n.d.	n.d.	n.d.	n.d.	n.d.	n.d.	n.d.
Ge	0.0134645	n.d.	n.d.	n.d.	n.d.	n.d.	n.d.	n.d.	n.d.	n.d.	n.d.	n.d.	n.d.	n.d.	n.d.
Rb	0.00339031	0.00318782	n.d.	0.00948065	0.00921871	0.00266316	0.00580957	0.00240043	0.000827229	n.d.	0.00685811	0.00423637	0.0115785	0.0162981	0.0029251
Sr	n.d.	n.d.	n.d.	n.d.	n.d.	n.d.	n.d.	n.d.	n.d.	n.d.	n.d.	n.d.	n.d.	n.d.	n.d.
Y	n.d.	0.0416391	n.d.	0.0503227	0.0526799	0.0704197	0.0425073	0.0554092	0.0428794	0.0738937	0.0565257	0.0466013	0.0499506	0.0525556	0.0413909
Zr	n.d.	n.d.	n.d.	n.d.	n.d.	n.d.	n.d.	n.d.	n.d.	n.d.	0.00782834	n.d.	n.d.	n.d.	0.000698312
Nb	0.00138056	0.0305522	n.d.	0.0326311	0.0404663	0.0782046	0.0300725	0.0491021	0.064452	0.0516593	0.0465425	0.114025	0.0267296	0.12426	0.0283135
Mo	0.00416116	n.d.	0.71157	n.d.	n.d.	1.57562	n.d.	n.d.	n.d.	n.d.	n.d.	1.58887	1.90438	n.d.	n.d.
Rh	n.d.	0.0196759	n.d.	0.0207778	0.0199208	0.020043	0.0206551	0.0205329	0.0201657	0.0206551	0.0201657	0.0210223	0.0204106	0.0199208	0.020288
Cd	n.d.	n.d.	0.00901138	n.d.	n.d.	n.d.	n.d.	n.d.	n.d.	n.d.	n.d.	n.d.	n.d.	n.d.	n.d.
Sn	0.00409976	n.d.	n.d.	n.d.	n.d.	n.d.	n.d.	n.d.	n.d.	n.d.	n.d.	n.d.	n.d.	n.d.	n.d.
Cs	0.000991005	0.0136627	n.d.	0.0139973	0.0134956	0.014332	0.014332	0.014332	0.0136627	0.0163389	0.0150008	0.0136627	0.0155025	0.0134956	0.0141644
Ba	n.d.	n.d.	n.d.	n.d.	n.d.	n.d.	n.d.	n.d.	n.d.	n.d.	n.d.	n.d.	n.d.	0.0150889	n.d.
La	n.d.	0.206946	n.d.	0.44226	2.36768	1.30388	0.230226	4.37318	56.5557	11.2318	1.55707	5.19116	14.1625	0.222819	0.207651
Ce	n.d.	0.156733	0.0392109	0.16193	0.510989	0.21423	0.209475	0.18327	0.985597	0.210028	0.205716	4.94913	0.157507	0.160714	0.166353
Pr	n.d.	0.0666387	n.d.	0.0666387	0.0672251	0.0677276	0.0709936	0.0669739	0.0668899	0.0533542	0.0714124	0.0672251	0.0666387	0.0686488	0.0663875
Nd	n.d.	n.d.	n.d.	n.d.	n.d.	n.d.	n.d.	n.d.	n.d.	n.d.	n.d.	n.d.	n.d.	n.d.	n.d.
Sm	n.d.	0.0574145	n.d.	0.0599092	0.0718818	0.058911	0.0574145	0.058911	0.0594109	0.0738782	0.0738782	0.0569161	0.0614058	0.0584127	0.0569161
Eu	n.d.	n.d.	n.d.	n.d.	n.d.	n.d.	n.d.	n.d.	n.d.	n.d.	n.d.	n.d.	n.d.	n.d.	n.d.
Gd	n.d.	n.d.	n.d.	n.d.	n.d.	n.d.	n.d.	n.d.	n.d.	n.d.	n.d.	n.d.	n.d.	n.d.	n.d.
Gd	n.d.	0.0377231	n.d.	0.0391153	0.0416206	0.0474673	0.038002	0.0416206	0.0399504	0.0460751	0.0432908	0.0494156	0.0399504	0.0385582	0.037445
Tb	n.d.	0.224794	n.d.	0.224974	0.225154	0.224914	0.224794	0.226536	0.224794	0.224854	0.225755	0.225755	0.224794	0.225395	0.224914
Dy	n.d.	n.d.	n.d.	n.d.	n.d.	n.d.	n.d.	n.d.	n.d.	n.d.	n.d.	n.d.	n.d.	n.d.	n.d.
Ho	n.d.	n.d.	n.d.	n.d.	n.d.	n.d.	n.d.	n.d.	n.d.	n.d.	n.d.	n.d.	n.d.	n.d.	n.d.
Er	n.d.	n.d.	n.d.	n.d.	n.d.	n.d.	n.d.	n.d.	n.d.	n.d.	n.d.	n.d.	n.d.	n.d.	n.d.
Tm	n.d.	0.0443511	n.d.	0.0444057	0.0444057	0.0444604	0.0444057	0.0445696	0.0444604	0.0444604	0.0445696	0.0444604	0.0444604	0.0444057	0.0444057
Yb	n.d.	0.0165427	n.d.	0.0165427	0.0167886	0.0165427	0.0172812	0.0165427	0.0165427	0.0165427	0.0167886	0.0182655	0.0167886	0.0165427	0.0165427
Lu	n.d.	0.0617719	n.d.	0.0617719	0.0617719	0.0617719	0.0618215	0.0617719	0.0618713	0.0618215	0.0619209	0.0619705	0.0618713	0.0617719	0.0618713
Hf	n.d.	n.d.	n.d.	n.d.	n.d.	n.d.	n.d.	n.d.	n.d.	n.d.	n.d.	n.d.	n.d.	n.d.	n.d.
Ta	n.d.	0.0470167	n.d.	0.0487921	0.0478815	0.0479271	0.0509315	0.0607659	0.0494749	0.0534355	0.05298	0.0498404	0.0480637	0.0496114	0.0464249
W	0.00760195	0.106384	0.0572798	1.78888	0.0859664	0.154099	0.258348	0.249318	0.0879011	0.160977	0.212347	0.229543	0.154744	0.0984319	0.0696326
Tl	0.00774057	0.230007	n.d.	0.235653	0.256667	0.234172	0.23158	0.241485	0.405823	0.232506	0.23482	1.76583	4.61663	0.231025	0.228341
Pb	0.00317026	n.d.	n.d.	n.d.	n.d.	n.d.	n.d.	n.d.	n.d.	n.d.	n.d.	n.d.	n.d.	n.d.	n.d.
Bi	n.d.	n.d.	n.d.	n.d.	n.d.	n.d.	n.d.	n.d.	n.d.	n.d.	n.d.	n.d.	n.d.	n.d.	n.d.
Th	n.d.	n.d.	n.d.	n.d.	n.d.	n.d.	n.d.	n.d.	n.d.	n.d.	n.d.	n.d.	n.d.	n.d.	n.d.
U	n.d.	0.0620685	0.0488909	0.0652827	0.20954	0.0938921	0.0629257	0.295962	0.746996	0.262718	0.536891	0.368468	0.939651	0.0874625	0.0620149
Note: Calcium concentration of all samples were diluted to ~5000 ng g-1.

## Sheet: Table S2
Table S2 Calcium isotopic compositions of standard materials from this study (bold font) and literatures
Reference material	Lithology	δ44/42CaSRM915a /‰	2SDa	δ43/42CaSRM915a /‰	2SDa	Nb	Methodc	Ref.
NIST SRM 915b	Calcium carbonate	0.361968	0.04845	0.169785	0.0636978	67
		0.38	0.0424264	0.18	0.0141421	2	SSB, MC-ICP-MS	Schiller et al., 2012
		0.34	0.06			15	SSB, MC-ICP-MS	Harouaka et al., 2016
		0.357	0.069			41	DS-TIMSd	He et al., 2017
		0.351508	0.0537026			38	DS-TIMSd	Feng et al., 2017
		0.359701	0.00992746			3	SSB, MC-ICP-MS	Feng et al., 2018
DTS-2	Dunite	0.611285	0.0739006	0.310614	0.0957404	14
		0.585846	0.0537026			9	DS-TIMSd	Feng et al., 2017
DNC-1	Dolerite	0.408894	0.0285121	0.194624	0.0615372	4
		0.38	0.0424264	0.18	0.0141421	2	SSB, MC-ICP-MS	Schiller et al., 2012
		0.40521	0.0292923			5	DS-TIMSd	Liu et al., 2017
		0.398583	0.038381			9	DS-TIMSd	Feng et al., 2017
		0.398122	0.052621			4	SSB, MC-ICP-MS	Feng et al., 2018
BCR-2	Basalt	0.377351	0.0660105	0.187821	0.100135	30
		0.34	0.0565685	0.16	0.0282843	2	SSB, MC-ICP-MS	Schiller et al., 2012
		0.4	0.02	0.2	0.03	4	SSB, MC-ICP-MS	Colla et al., 2013
		0.424738	0.151344			3	SSB, MC-ICP-MS	Valdes et al., 2014
		0.383	0.058			4	DS-TIMSd	He et al., 2017
		0.400328	0.0439385			12	DS-TIMSd	Liu et al., 2017
		0.387862	0.0565433			24	DS-TIMSd	Feng et al., 2017
		0.408005	0.0517599			4	SSB, MC-ICP-MS	Feng et al., 2018
BHVO-2	Basalt	0.375219	0.0648739	0.173367	0.0709754	41
		0.38	0.0565685	0.18	0.0282843	2	SSB, MC-ICP-MS	Schiller et al., 2012
		0.424738	0.0781128			10	SSB, MC-ICP-MS	Valdes et al., 2014
		0.439385	0.0537026			5	DS-TIMSd	Magna et al., 2015
		0.375	0.034			7	DS-TIMSd	He et al., 2017
		0.390564	0.0488205			16	DS-TIMSd	Liu et al., 2017
		0.374612	0.0506918			12	DS-TIMSd	Feng et al., 2017
		0.413435	0.0415817			4	SSB, MC-ICP-MS	Feng et al., 2018
BIR-1	Basalt	0.40262	0.0597945	0.200867	0.0745746	35
		0.434502	0.0390564			4	SSB, MC-ICP-MS	Valdes et al., 2014
		0.410092	0.0439385			9	DS-TIMSd	Liu et al., 2017
		0.384624	0.0586913			9	DS-TIMSd	Feng et al., 2017
AGV-2	Andesite	0.330311	0.0448013	0.146615	0.0202298	6
		0.375918	0.0829949			3	SSB, MC-ICP-MS	Valdes et al., 2014
		0.349	0.044			3	DS-TIMSd	He et al., 2017
		0.346626	0.0537026			8	DS-TIMSd	Liu et al., 2017
		0.38373	0.0448721			9	DS-TIMSd	Feng et al., 2017
GSP-2	Granodiorite	0.330151	0.0316728	0.173516	0.0575428	5
		0.317	0.014			3	DS-TIMSd	He et al., 2017
COQ-1	Carbonatite	0.346635	0.0122166	0.217995	0.0112565	2
		0.335	0.039			4	DS-TIMSd	He et al., 2017
		0.331979	0.0537026			8	DS-TIMSd	Liu et al., 2017
		0.346626	0.0534073			4	DS-TIMSd	Feng et al., 2017
SGR-1	Shale	0.40207	0.0286707	0.176175	0.0521889	4
		0.4	0.0282843	0.19	0.0141421	2	SSB, MC-ICP-MS	Schiller et al., 2012
		0.414974	0.0537026			3	DS-TIMSd	Liu et al., 2017
		0.373843	0.0688241			10	DS-TIMSd	Feng et al., 2017
NOD-A-1	Manganese Nodule	0.500737	0.0461873	0.266673	0.066693	3
		0.556554	0.0537026			3	DS-TIMSd	Liu et al., 2017
		0.490438	0.0660024			9	DS-TIMSd	Feng et al., 2017
		0.598212	0.0752031			4	SSB, MC-ICP-MS	Feng et al., 2018
NOD-P-1	Manganese Nodule	0.343209	0.016508	0.173502	0.0828647	3
		0.361272	0.0488205			13	DS-TIMSd	Liu et al., 2017
		0.362233	0.044228			8	DS-TIMSd	Feng et al., 2017
		0.388776	0.0540299			3	SSB, MC-ICP-MS	Feng et al., 2018
a2SD, 2 standard deviation;
breplicate was measured from independent digestion of the given sample;
cMeasurement methods include double spike TIMS method (DS-TIMS) and standard-sample-standard bracketing MC-ICP-MS method (SSB, MC-ICP-MS);
dAll the literature data were converted to the δ44/42Ca from δ44/40Ca by dividing 2.048 (Young et al., 2002) if only δ44/40Ca has been reported and the corresponding uncertainty is also divided by 2.048.
Reference:
Colla, C. A., Wimpenny, J., Yin, Q. Z., Rustad, J. R., Casey, W. H., 2013. Calcium-isotope fractionation between solution and solids with six, seven or eight oxygens bound to Ca(II). Geochimica Et Cosmochimica Acta, 121(15), 363-373.
Feng, L. P., Zhou, L., Yang, L., Depaolo, D. J., Tong, S. Y., Liu, Y. S., Owens, T. J., Gao, S., 2017. Calcium isotopic compositions of sixteen USGS reference materials. Geostandards and Geoanalytical Research, 41(1), 93-106.
Feng, L. P., Zhou, L., Yang, L., Zahng, W., Wang, Q., Tong, S. Y, Hu, Z. C., 2018. A rapid and simple single-stage method for Ca separation from geological and biological samples for isotopic analysis by MC-ICP-MS. Journal of Analytical Atomic Spectrometry, 33, 413-421.
Harouaka, K., Mansor, M., Macalady, J. L., Fantle, M. S., 2016. Calcium isotopic fractionation in microbially mediated gypsum precipitates. Geochimica Et Cosmochimica Acta, 184, 114-131.
He, Y., Wang, Y., Zhu, C., Huang, S., Li, S., 2017. Mass-independent and mass-dependent Ca isotopic compositions of thirteen geological reference materials measured by thermal ionisation mass spectrometry. Geostandards and Geoanalytical Research, 41 (2), 283-302.
Liu, F., Zhu, H. L., Li, X., Wang, G. Q., Zhang, Z. F., 2017. Calcium isotopic fractionation and compositions of geochemical reference materials. Geostandards and Geoanalytical Research, 41 (4), 675-688.
Magna, T., Gussone, N., Mezger, K., 2015. The calcium isotope systematics of mars. Earth and Planetary Science Letters, 430, 86-94.
Schiller, M., Paton, C., Bizzarro, M., 2012. Calcium isotope measurement by combined HR-MC-ICPMS and TIMS. Journal of Analytical Atomic Spectrometry, 27(1), 38-49.
Valdes, M. C., Moreira, M., Foriel, J., Moynier, F., 2014. The nature of earth's building blocks as revealed by calcium isotopes. Earth and Planetary Science Letters, 394, 135-145.
Young E.D., Ash R.D., Galy A. Belshaw N.S., 2002. Mg isotope heterogeneity in the Allende meteorite measured by UV laser ablation-MC-ICP-MS and comparisons with O isotopes. Geochimica et Cosmochimica Acta, 66, 683–698.
